# Supplementary material
Source: Elsevier journal article supplement (https://www.sciencedirect.com/science/article/pii/S188842962030008X)
Supplement: mmc1 [file S188842962030008X:mmc1.doc]

**APPENDIX A**

**Convergence Insufficiency Symptoms Survey**

Name _____________________________________ DATE __/__/__

**Clinical instruction;** Read the following subject instruction and then each item exactly as written. If subject respond with “yes”- please qualify with frequency choices. **Do not give examples**. **Subject instructions:** please answer the following questions about how your eyes feel when reading or doing close work.

Part 1 survey

|  |  | Never | (not very often)  Infrequently | Sometimes | Fairly often | Always |
| --- | --- | --- | --- | --- | --- | --- |
| 1. | Do your eyes feel tired when reading or doing close work? |  |  |  |  |  |
| 2. | Do your eyes feel uncomfortable when reading or doing close work? |  |  |  |  |  |
| 3. | Do you have headache when reading or doing close work? |  |  |  |  |  |
| 4. | Do you feel sleepy when reading or doing close work? |  |  |  |  |  |
| 5. | Do you lose concentration when reading or doing close work? |  |  |  |  |  |
| 6. | Do you have trouble remembering what you have read? |  |  |  |  |  |
| 7. | Do you have double vision when reading or doing close work? |  |  |  |  |  |
| 8. | Do you see the words move, jump, swim or appear to float on the page when reading or doing close work? |  |  |  |  |  |
| 9. | Do you feel like you read slowly? |  |  |  |  |  |
| 10. | Do your eyes ever hurt when reading or doing close work? |  |  |  |  |  |
| 11. | Do your eyes ever feel sore when reading or doing close work? |  |  |  |  |  |
| 12. | Do you feel a”pulling” feeling around your eyes when reading or doing close work? |  |  |  |  |  |
| 13. | Do you notice the words blurring or coming in and out of focus when reading or doing close work? |  |  |  |  |  |
| 14. | Do you lose your place while reading or doing close work? |  |  |  |  |  |
| 15 | Do you have to re-read the same line of words when reading? |  |  |  |  |  |
|  |  | _x0 | _x1 | _x2 | _x3 | _x4 |

**APPENDIX B**

**Part 2: list of complied symptoms questionnaire**

| 1. | Do you tend to hold book too close while reading? |
| --- | --- |
| 2. | Do you hold book away while reading? |
| 3. | Do you see things as blurry (not clear) when you read or use the computer? |
| 4. | Do you feel dizzy when you read? |
| 5. | Do your eyes water when you read? |
| 6. | Do you have problems when you look on the chalkboard, back to your textbook, and back to the chalkboard again? |
| 7. | Do you suffer from headaches after school? |
| 8. | Does your eye turn red after reading? |
| 9. | Do you frown or “squeeze” your face when you read? |
